# Supplementary material for: Fluorescent films based on PVDF doped with carbon dots for evaluation of UVA protection of sunscreens and fabrication of cool white LEDs
Source: Royal Society of Chemistry journal article supplement (doi:10.1039/d1ra04746a), 2021-01-01
Supplement: d1ra04746a1.pdf [file d1ra04746a1.pdf]

## Fluorescent films based on PVDF doped with carbon dots for evaluation of UVA protection of sunscreens and fabrication of cool white LEDs

Daniel Hernández-Rivera,<sup>\*a</sup> Simeí Darinel Torres-Landa,<sup>a</sup> Miriam Rangel-Ayala<sup>a</sup> and Vivechana Agarwal<sup>\*a</sup>

<sup>a</sup> Centro de Investigación en Ingeniería y Ciencias Aplicadas, UAEM, Av. Universidad 1001, Col. Chamilpa, Cuernavaca, Morelos 62209

Emails: (DHR) danrn482@gmail.com,  
(VA) vagarwal@uaem.mx

### Supplementary material

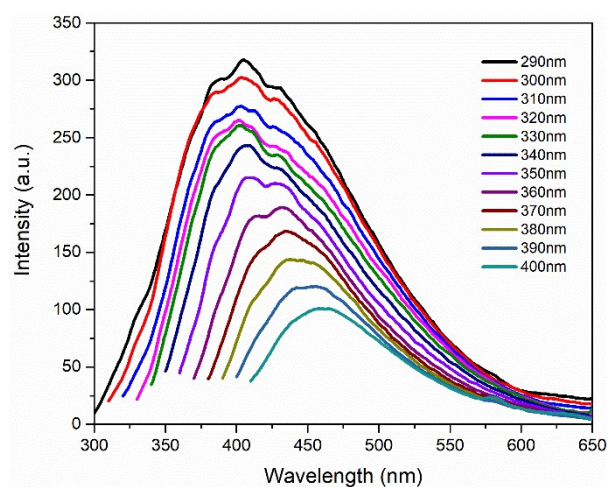

Fig. S1 Photoluminescence emission of the CDs suspended in DMF solution as a function of excitation wavelength. The emission shifts towards higher wavelengths as the excitation wavelength increase.

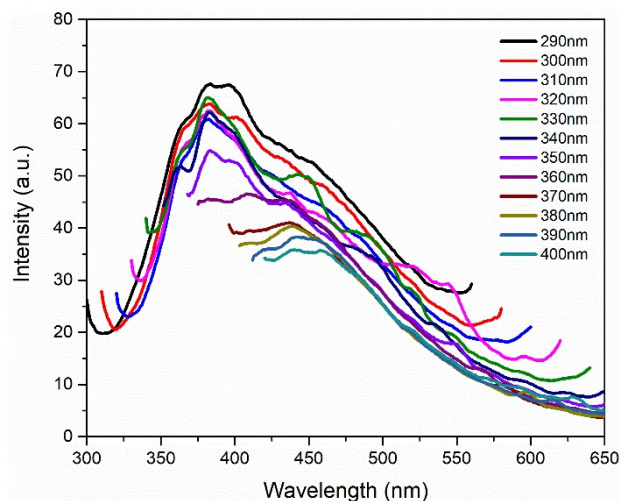

Fig. S2 Excitation wavelength dependent photoluminescence emission of the PVDF/CDs-1200 film. The emission at 456 nm is retained for the different excitation wavelengths.

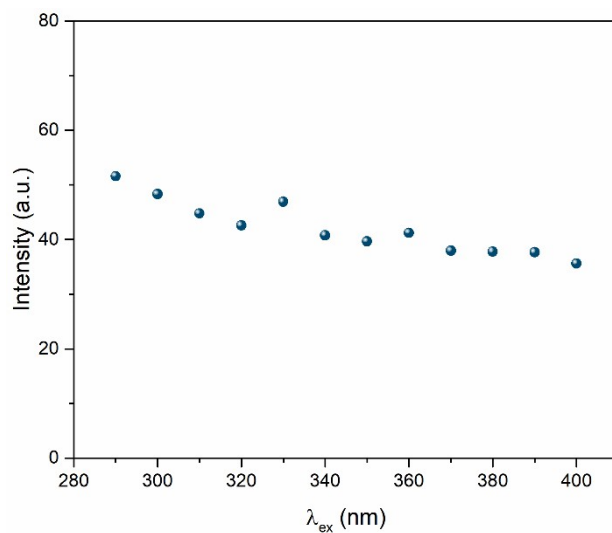

Fig. S3 Photoluminescence peak intensity of the PVDF/CDs-1200 film measured at  $\lambda_{em}=456$  nm as a function of excitation wavelength. This emission was used to evaluate the fluorescence intensity of the films coated with sunscreen products.

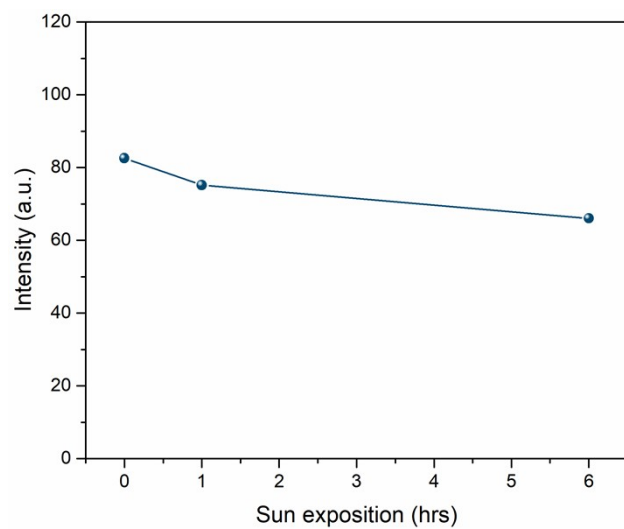

Fig. S4 Fluorescence intensity of the PVDF/CDs-1200 film after 6 hours of continuous exposure to sunlight. The photoluminescence decreased by about 19.5 %.
